# Supplementary material
Source: PubMed Central journal article supplement (PMC2755693)

# Supplementary Fig. 1

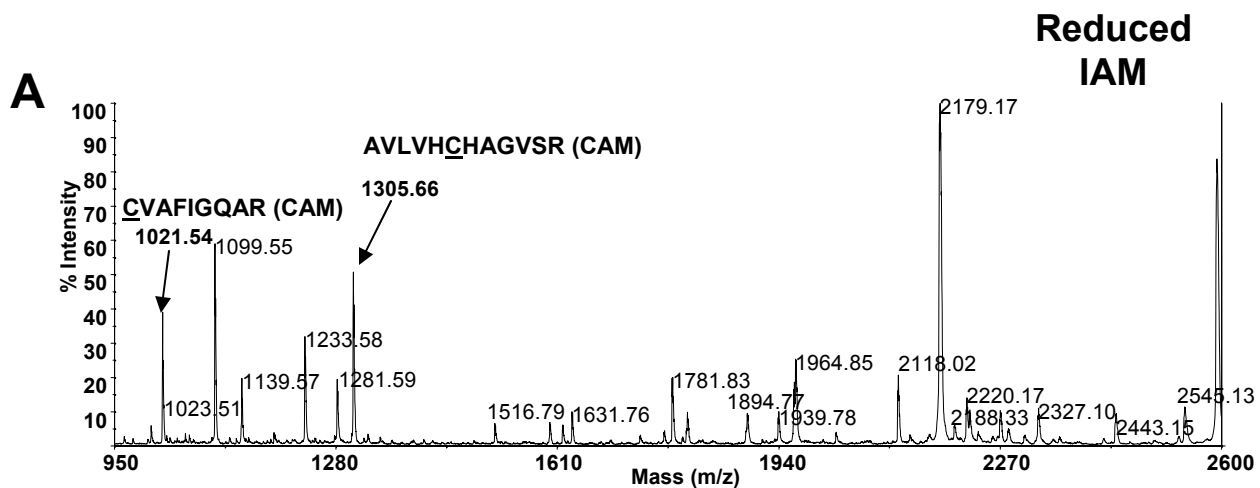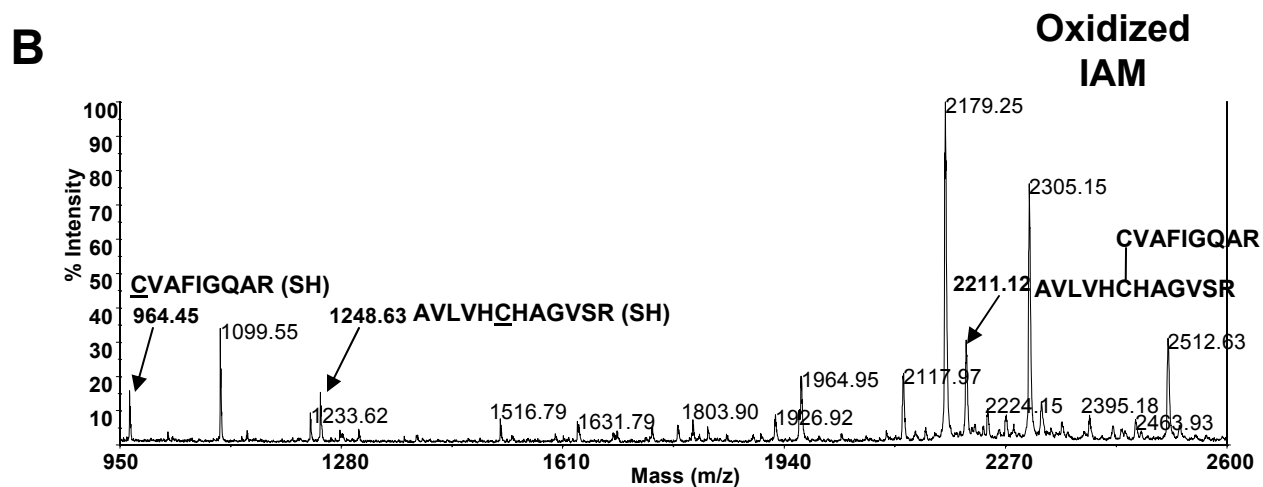

# Supplementary Fig. 2

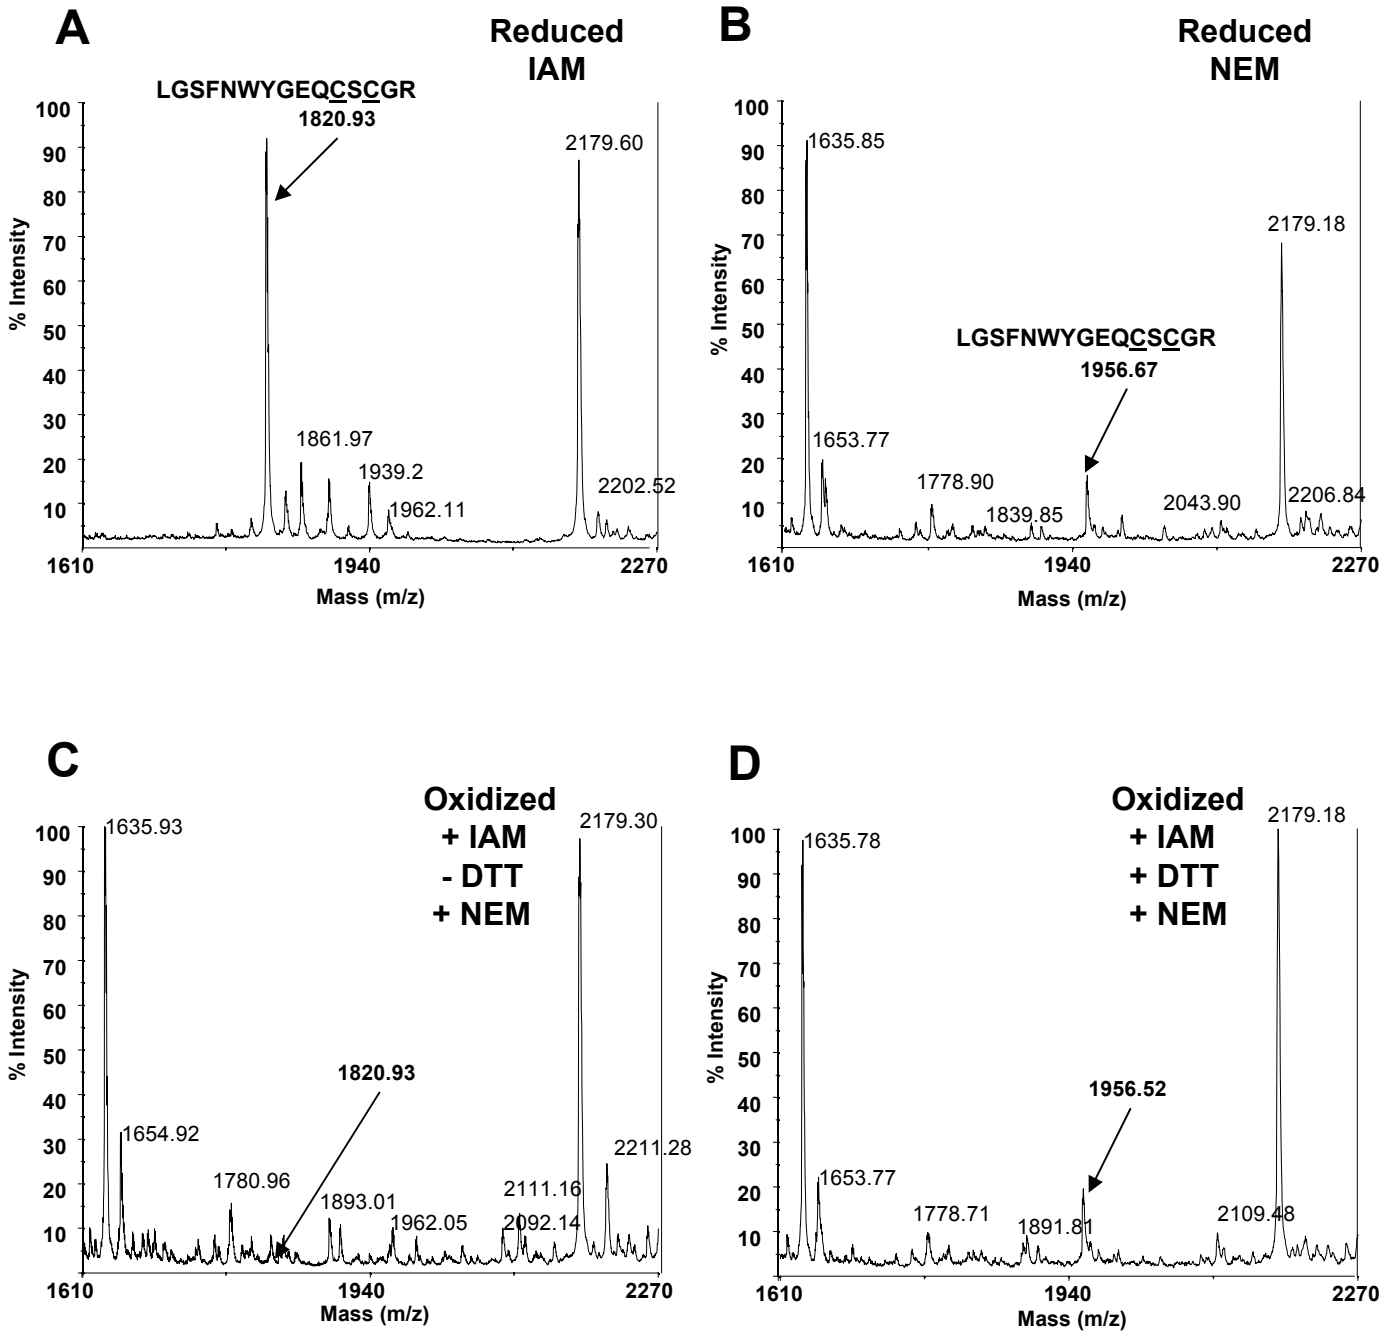

Supplement: supp_M109.038612_jbc.M109.038612-1.pdf [file supp_M109.038612_jbc.M109.038612-1.pdf]
